# Supplementary material for: Flexible, low volume detection of chronobiology biomarkers from human sweat
Source: Royal Society of Chemistry journal article supplement (doi:10.1039/c9an01968e), 2019-12-23
Supplement: c9an01968e1.pdf [file c9an01968e1.pdf]

## Supplementary information

### Flexible, low volume detection of chronobiology biomarkers from human sweat

Sayali Upasham<sup>a</sup>, Kevin Thai<sup>a†</sup>, Ritika Muthyala<sup>a†</sup>, Shalini Prasad<sup>a\*</sup>

#### 1. Porosity details for Polyamide membrane

|                    |        |
|--------------------|--------|
| Pore size          | 200 nm |
| Thickness          | 110 μm |
| Bubble point (bar) | 4.2    |

2. Formulae:
- a. Ratio of change in response =  $\frac{(\text{dose impedance} - \text{baseline impedance})}{\text{baseline impedance}}$
- b. Percentage change in response =  $\frac{(\text{dose impedance} - \text{baseline impedance})}{\text{baseline impedance}} * 100$

#### 3. Ionic strength stability

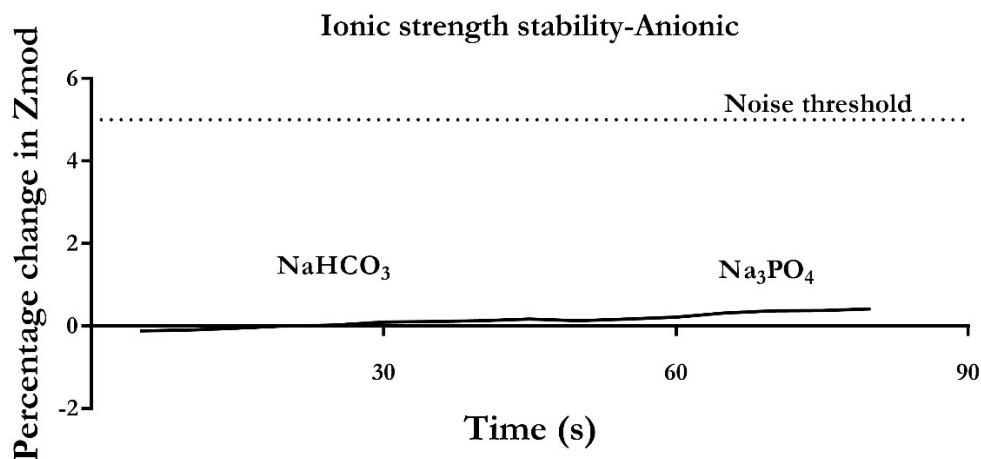

Figure S1: Stability of electrode using different Anionic solutions

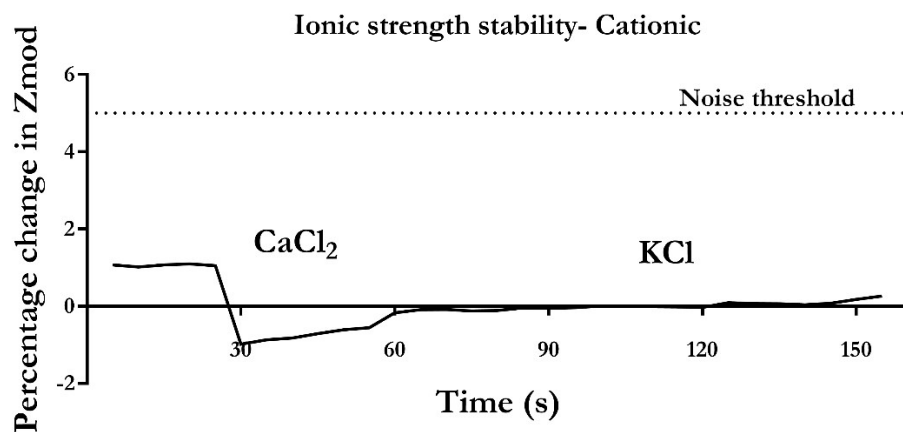

Figure S2 : Stability of electrode using different Cationic solutions

#### 4. Raw Impedance values for DHEA

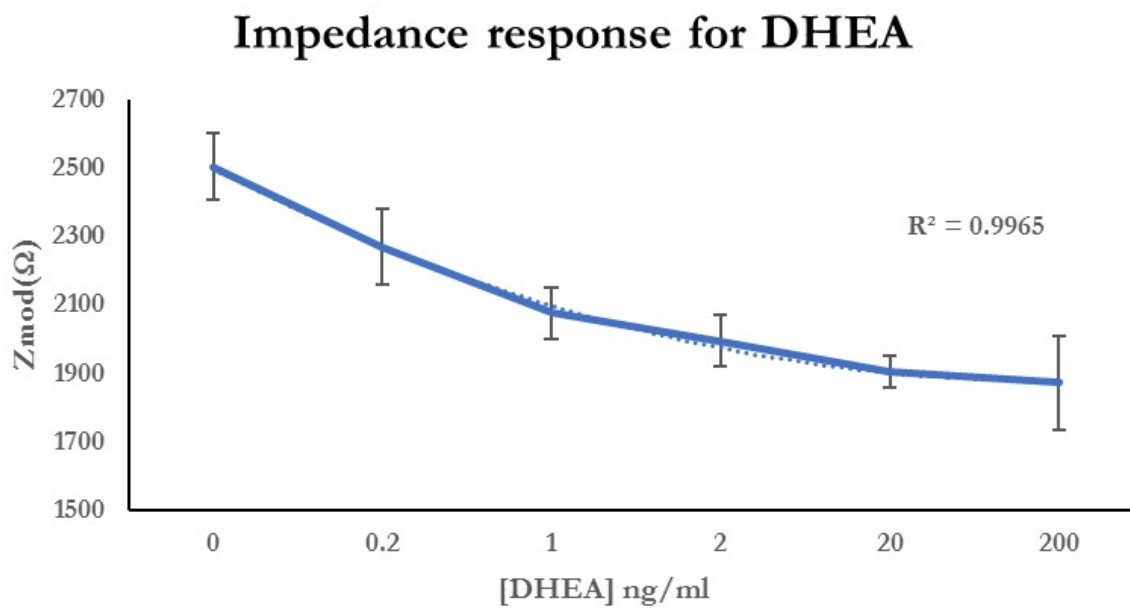

Figure S3: Impedance response for DHEA

## 5. Raw Impedance value for cortisol

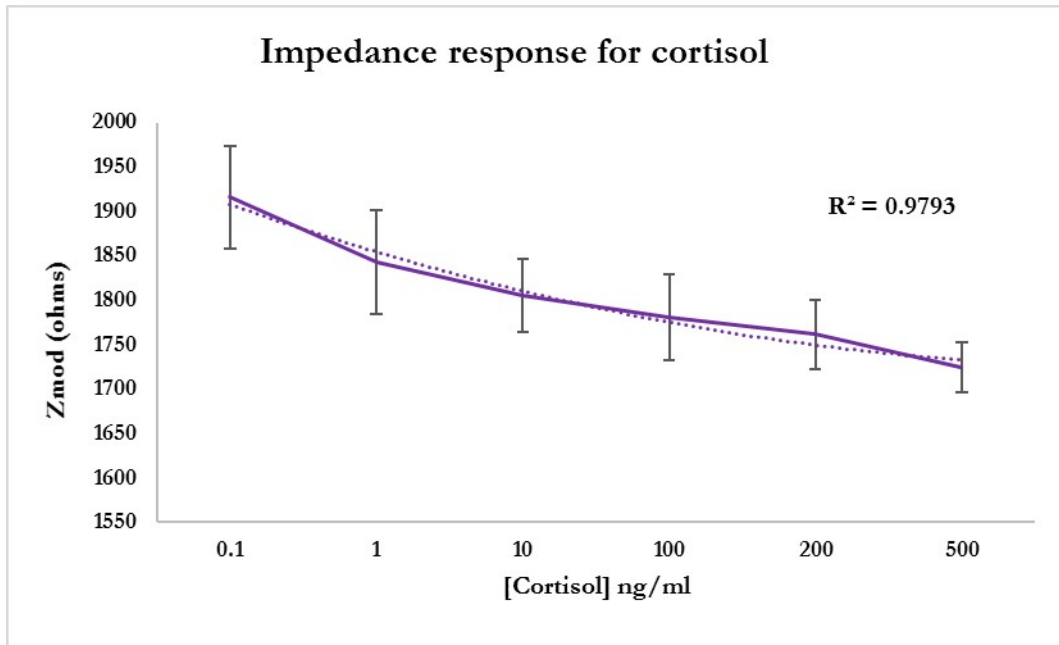

Figure S4: Impedance response for cortisol

## 6. Response for Cortisol in Human sweat

### CDR for cortisol in Human sweat

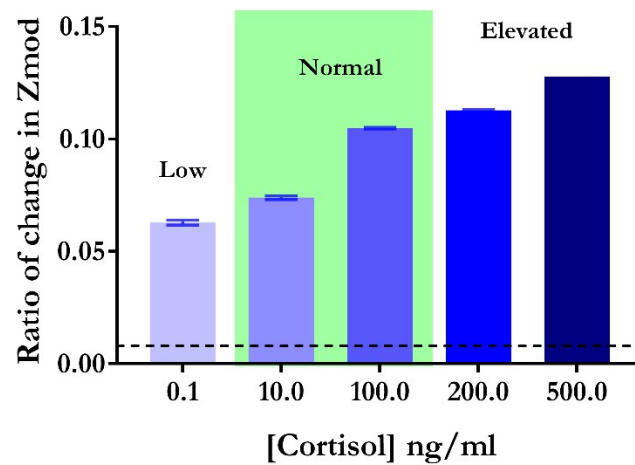

Figure S5: Calibrated dose response for cortisol in Human sweat,  $R^2 > 0.95$

**7. Similac infant formula constituents**

Nonfat Milk, Lactose, Whey Protein Concentrate, High Oleic Safflower Oil, Soy Oil, Coconut Oil, Galactooligosaccharides. Less than 2% of: C. Cohnii Oil, M. Alpina Oil, Beta-Carotene, Lutein, Lycopene, Potassium Citrate, Calcium Carbonate, Ascorbic Acid, Soy Lecithin, Potassium Chloride, Magnesium Chloride, Ferrous Sulfate, Choline Bitartrate, Choline Chloride, Ascorbyl Palmitate, Salt, Taurine, m-Inositol, Zinc Sulfate, Mixed Tocopherols, d-Alpha-Tocopheryl Acetate, Niacinamide, Calcium Pantothenate, L-Carnitine, Vitamin A Palmitate, Cupric Sulfate, Thiamine Chloride Hydrochloride, Riboflavin, Pyridoxine Hydrochloride, Folic Acid, Manganese Sulfate, Phylloquinone, Biotin, Sodium Selenate, Vitamin D3, Cyanocobalamin, Calcium Phosphate, Potassium Phosphate, Potassium Hydroxide, and Nucleotides (Adenosine 5'-Monophosphate, Cytidine 5'-Monophosphate, Disodium Guanosine 5'-Monophosphate, Disodium Uridine 5'-Monophosphate).

**Similac vitamins**

|                           |          |
|---------------------------|----------|
| Vitamin A                 | 300 IU   |
| Vitamin D                 | 75 IU    |
| Vitamin E                 | 1.5 IU   |
| Vitamin K                 | 8 mcg    |
| Thiamin (MT. B1)          | 100 mcg  |
| Riboflavin (Mt. B2)       | 150 mcg  |
| Vitamin B6                | 60 mcg   |
| Vitamin B12               | 0.25 mcg |
| Niacin                    | 1050 mcg |
| Folic Acid                | 15 mcg   |
| Pantothenic Acid          | 450 mcg  |
| Biotin                    | 4.4 mcg  |
| Vitamin C (Ascorbic Acid) | 9 mg     |
| Choline                   | 16 mg    |
| Inositol                  | 4.7 mg   |

**Similac minerals**

|            |         |
|------------|---------|
| Calcium    | 78 mg   |
| Phosphorus | 42 mg   |
| Magnesium  | 6 mg    |
| Iron       | 1.8 mg  |
| Zinc       | 0.75 mg |
| Manganese  | 5 mcg   |
| Copper     | 90 mcg  |
| Iodine     | 6 mcg   |
| Selenium   | 2 mcg   |
| Sodium     | 24 mg   |
| Potassium  | 105 mg  |
| Chlorine   | 65 mg   |

8. Nyquist and Bode plots for analytical curves

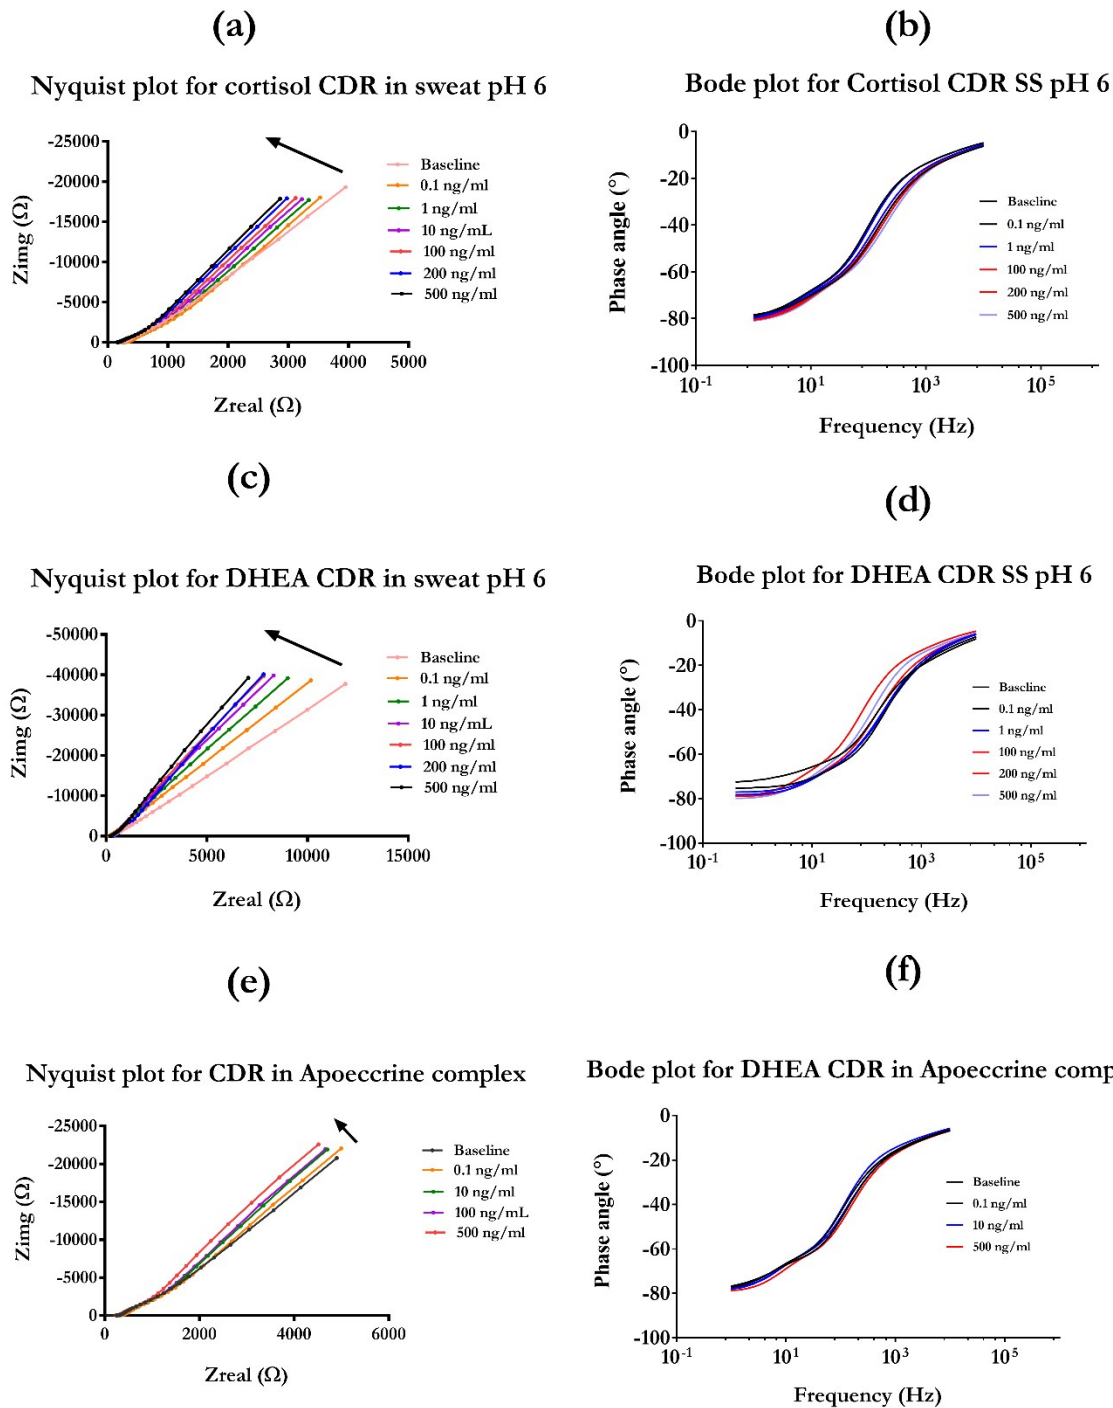

Figure S6: Nyquist and Bode phase plots for EIS analytical data
